# Supplementary material for: Titin stiffness modifies the force-generating region of muscle sarcomeres
Source: PubMed Central journal article supplement (PMC4832248; doi:10.1038/srep24492), 2016-04-15
Supplement: srep24492-s1.pdf [file srep24492-s1.pdf]

## Supplemental Information

### **Titin stiffness modifies the force-generating region of muscle sarcomeres**

**Yong Li<sup>#</sup>, Patrick Lang<sup>#</sup> & Wolfgang A. Linke<sup>\*</sup>**

Department of Cardiovascular Physiology, Ruhr University Bochum, Germany

\*Corresponding author:

Wolfgang A. Linke, PhD

Dept. of Cardiovascular Physiology

Ruhr University Bochum, MA 03/56

D-44780 Bochum, Germany

Email: [wolfgang.linke@rub.de](mailto:wolfgang.linke@rub.de)

<sup>#</sup>Co-first authors

**Figure S1, related to Figure 4**

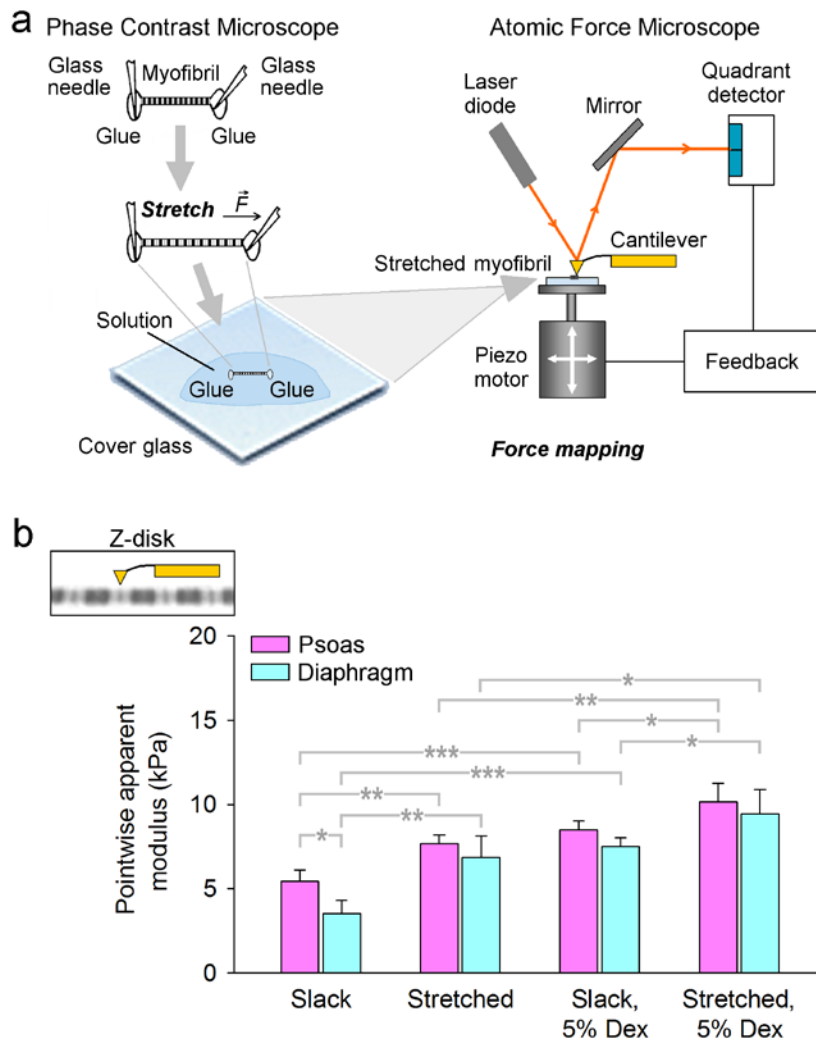

**Figure S1. AFM-based force mapping of sarcomeres to measure lateral stiffness.** (a) Workflow for force mapping experiments on stretched myofibrils. (b) Pointwise apparent modulus (at 60-100 nm indentation depth) to quantify the lateral stiffness of the Z-disk region of psoas and diaphragm sarcomeres in relaxing buffer at slack SL; ~145% stretch; slack SL, 5% dextran; and ~145% stretch, 5% dextran (n=5 sarcomeres analyzed per group). Data are mean±SEM; \*p<0.05; \*\*p<0.01; \*\*\*p<0.001, by ANOVA/Bonferroni-adjusted t-test.
